# Supplementary material for: Human Immunodeficiency Virus Type-1 Myeloid Derived Suppressor Cells Inhibit Cytomegalovirus Inflammation through Interleukin-27 and B7-H4
Source: PubMed Central journal article supplement (PMC5364511; doi:10.1038/srep44485), 2017-03-24
Supplement: srep44485-s1.pdf [file srep44485-s1.pdf]

# **Human Immunodeficiency Virus Type-1 Myeloid Derived Suppressor Cells Inhibit Cytomegalovirus Inflammation through Interleukin-27 and B7-H4**

**Ankita Garg<sup>§</sup>, Rodney Trout<sup>§</sup> and Stephen A. Spector<sup>§,†,\*</sup>**

<sup>§</sup>Department of Pediatrics, Division of Infectious Diseases, University of California San Diego, La Jolla, California 92093-0672, USA

<sup>†</sup>Rady Children's Hospital, San Diego, California, 92123, USA

\*Address correspondence to:

\*Stephen A. Spector, MD,

University of California San Diego, 9500 Gilman Drive

La Jolla, CA 92093-0672 USA

**Phone:** 858-534-7055    **Fax:** 858-534-7411

**E-mail:** [saspector@ucsd.edu](mailto:saspector@ucsd.edu)

## Supplemental Figure S1

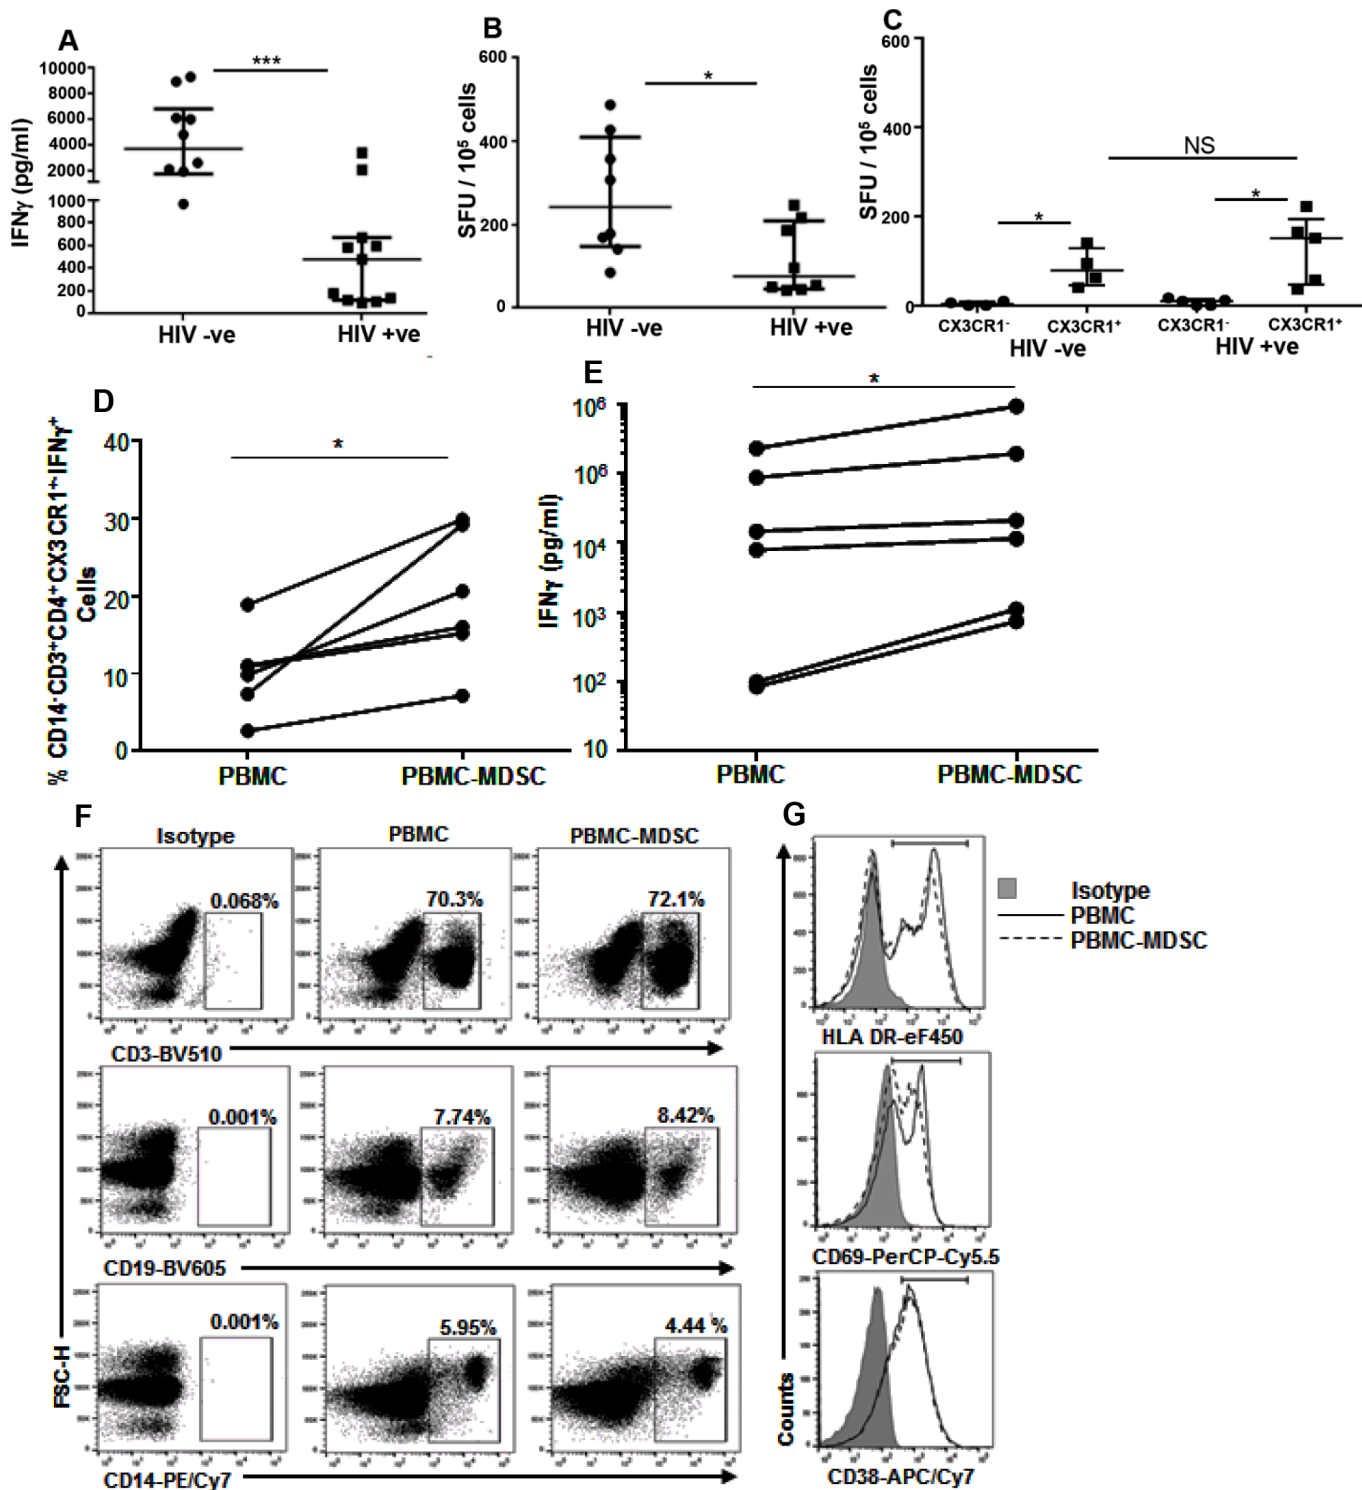

**CMVpp65 specific IFN $\gamma$  response is suppressed in HIV(+) donors. (A, B & C)** All donors were CMV(+) and either HIV-infected (HIV+) or HIV-uninfected (HIV-). (A) PBMCs from HIV(-) (n=9) and HIV(+) (n=11) donors were cultured with or without peptide pool of CMVpp65 (1  $\mu$ g/ml) for 72 hrs. IFN $\gamma$  (pg/ml) in culture supernatants

was determined by ELISA. Net IFN $\gamma$  produced was calculated: IFN $\gamma$  by Control cells – IFN $\gamma$  by pp65 stimulated cells.

**(B)** PBMCs from 8 HIV(-) and HIV(+) donors were cultured on ELISPOT plates coated with capture anti-IFN $\gamma$  Ab with or without CMVpp65. After 18 hrs, plates were washed and biotinylated anti-IFN $\gamma$  detection Ab was added for 2 hrs followed by addition of Streptavidin-HRP enzyme conjugate for 1 hr; plates were washed and substrate was added using AEC substrate kit (BD Biosciences). The substrate reaction was stopped by washing wells with water. Spots were air-dried, counted on an automated ELISPOT reader and spot forming units (SFU)/10<sup>5</sup> PBMCs were calculated.

**(C)** PBMCs from HIV(-) (n=4) and HIV(+) (n=5) donors were cultured with or without peptide pool of CMVpp65 (1  $\mu$ g/ml) for 48-72 hrs. CX3CR1<sup>-</sup> and CX3CR1<sup>+</sup> cells were sorted and cultured on ELISPOT plates coated with capture anti-IFN $\gamma$  Ab. After 18 hrs, cytokine producing cells were detected as above. **(D & E)** Freshly isolated PBMCs from CMV(+) HIV-uninfected healthy donors were stained with anti-CD14 and –HLA DR (clone L243) antibodies; CD14<sup>+</sup>HLA DR<sup>-/lo</sup> MDSC from few PBMCs were depleted using flow cytometry. Whole PBMC (PBMC) and MDSC depleted PBMC (PBMC-MDSC) were cultured with or without CMVpp65 for 72 hrs with Brefeldin A added for the last 5 hrs of culture. Culture supernatant was stored and cells were surface stained with anti-CD14, -CD3, -CD4 and –CX3CR1, fixed, permeabilized and stained using anti-IFN $\gamma$  for intracellular IFN $\gamma$ . **(D)** Percentage of CD14<sup>-</sup>CD3<sup>+</sup>CD4<sup>+</sup>CX3CR1<sup>+</sup>IFN $\gamma$ <sup>+</sup> cells was determined by flow cytometry. **(E)** Amount of IFN $\gamma$  in the culture supernatants was determined by ELISA. **(F & G)** CD14<sup>+</sup>HLA DR<sup>-/lo</sup> MDSC were depleted from PBMCs of CMV(+) HIV-infected individuals on ART and with suppressed viral load, as above. PBMC and PBMC-MDSC were stained with **(F)** anti-CD3,- CD19 and –CD14 or isotype control antibodies and percentage of CD3<sup>+</sup>, CD19<sup>+</sup> and CD14<sup>+</sup> cells was determined by flow cytometry. **(G)** anti- CD3, - HLA DR (clone LN3), -CD69 and –CD38; cells were gated on CD3<sup>+</sup> and expression of HLA DR, CD69 and CD38 was determined. Representative flow cytometry plots are shown **(A-E)**. Each dot in the plots depicts data of each individual donor; **(A, B& C)**, the plots include observations from 25<sup>th</sup> to 75<sup>th</sup> percentile; the horizontal line represents the median value. \*p<0.05, \*\*\*p<0.0005, NS Non significant

## Supplemental Figure S2

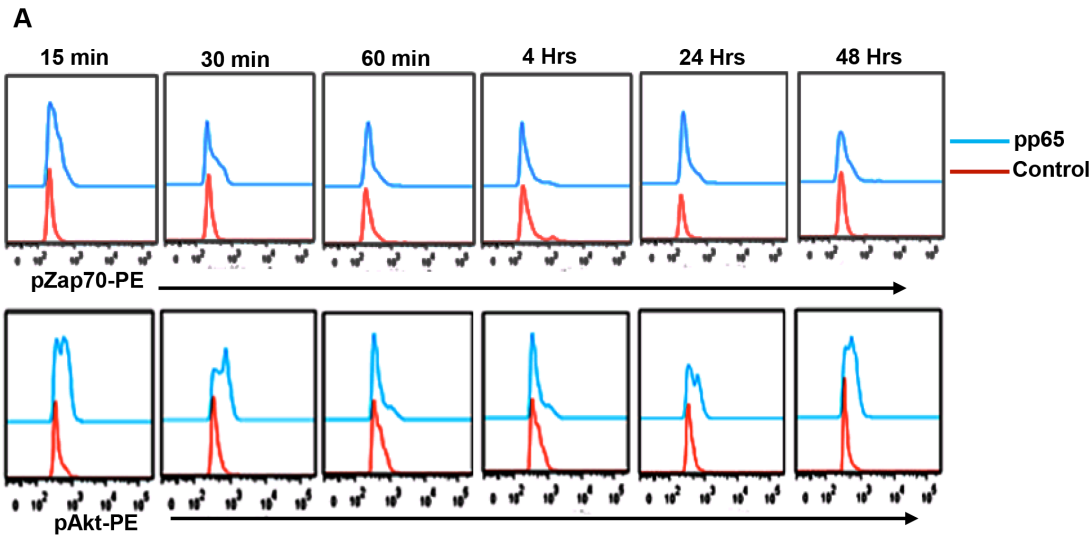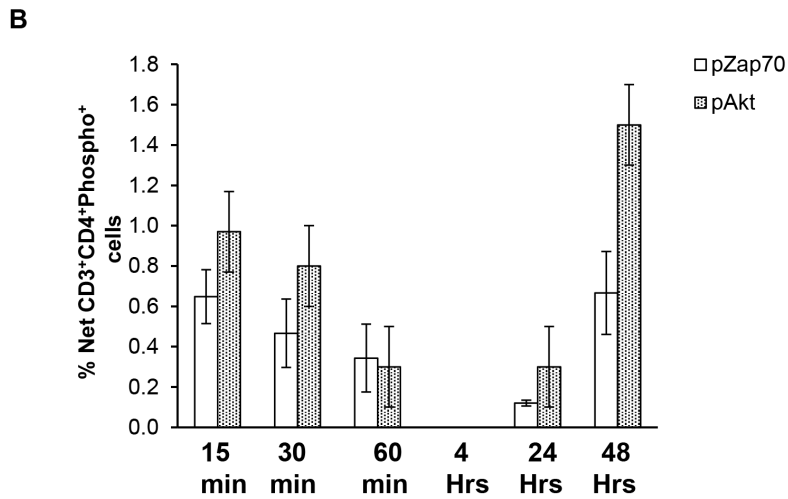

**Kinetics of pZap70 and pAkt.** To determine the kinetics of activation of Zap70 (pZap70) and Akt (pAkt) in presence of pp65, PBMCs of CMV(+) HIV-uninfected healthy donors were cultured in the presence or absence of pp65 peptide pool (1  $\mu\text{g/ml}$ ) for 15, 30, 60 min and 4, 24 and 48 hrs. Cells were surface stained with anti- CD3,-CD4 Abs followed by intracellular staining with anti-pZap70<sup>(pY292)</sup> or -pAkt<sup>(pS473)</sup> or isotype control Ab. pZap70 and pAkt in control, and pp65 treated cells were determined in CD3<sup>+</sup>CD4<sup>+</sup> cells by flow cytometry. Percent Net CD3<sup>+</sup>CD4<sup>+</sup>phospho<sup>+</sup> cells were calculated as: CD3<sup>+</sup>CD4<sup>+</sup>phospho<sup>+</sup> cells in control - CD3<sup>+</sup>CD4<sup>+</sup>phospho<sup>+</sup> cells in pp65 treated. **(A)** Representative histogram flow cytometry plot is shown for pZap70 (*Upper panel*) and pAkt (*Lower panel*). **(B)** Mean +/- SD are shown for 3 donors.

### Supplemental Figure S3

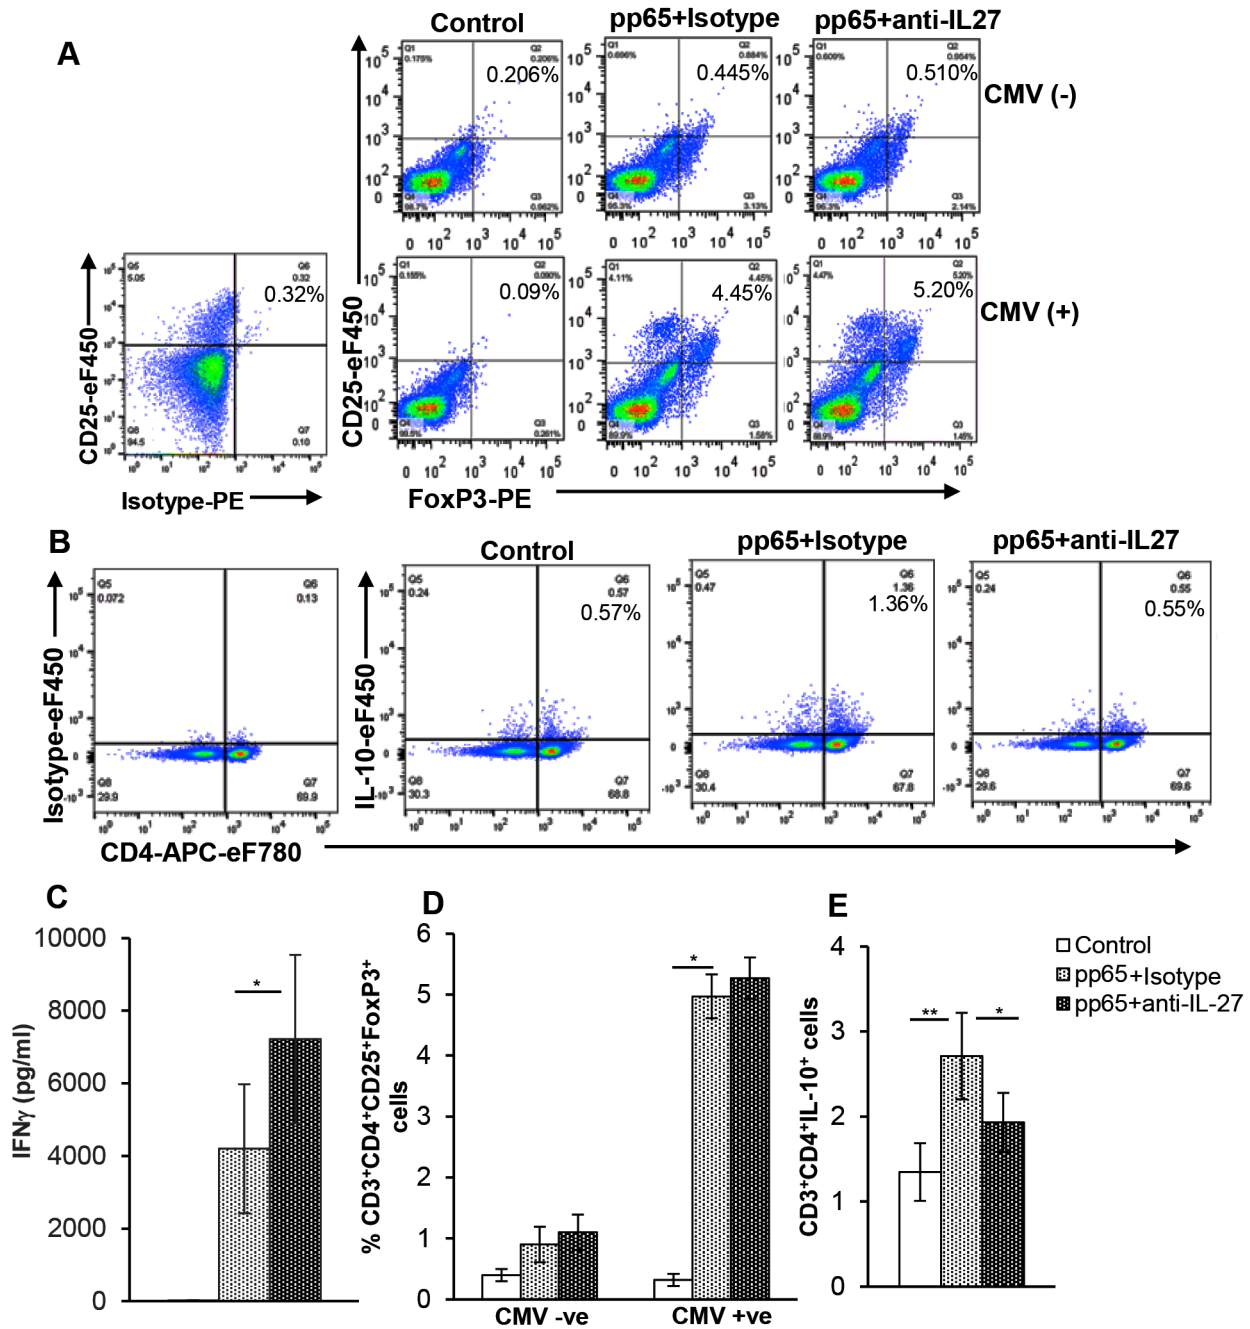

**Effect of IL-27 on T cell responses.** (A and B) Representative flow cytometry plots showing (A) CD3<sup>+</sup>CD4<sup>+</sup>CD25<sup>+</sup>FoxP3<sup>+</sup> Tregs in donor groups as indicated; (B) CD14<sup>-</sup>CD3<sup>+</sup>CD4<sup>+</sup>IL-10<sup>+</sup> cells in CMV(+) HIV-uninfected healthy donors. (C, D and E) All the donors were HIV(-) and either CMV(-) or CMV(+). (C) To determine the effect of IL-27 on CMV IFN $\gamma$  production, PBMCs of CMV (+) HIV(-) (n=6) were cultured with or without CMVpp65 in the presence or absence of neutralizing anti-IL-27 Ab. Supernatants were collected after 48 hrs

and the quantity of IFN $\gamma$  determined by ELISA. (D) Effect of IL-27 on Treg cell expansion was determined. PBMCs (n=4) from CMV (-) or CMV (+) HIV(-) donors were cultured with or without CMVpp65 in the presence or absence of neutralizing anti-IL27 Ab. After 3 days, cells were surface stained using anti-CD3, -CD4, -CD25 Abs followed by intracellular staining using anti-FoxP3 or isotype control Ab. % CD3<sup>+</sup>CD4<sup>+</sup>CD25<sup>+</sup>FoxP3<sup>+</sup> cells were determined by flow cytometry. (E) Effect of IL-27 on IL-10 production by CD4<sup>+</sup> T cells was determined. PBMCs of CMV (+) HIV(-) (n=6) were cultured with or without the CMVpp65 in the presence or absence of neutralizing anti-IL-27 Ab for 48 hrs. Brefeldin A was added for the last 5 hrs of culture. Cells were surface stained with anti-CD14, -CD3, -CD4, fixed, permeabilized and stained with anti-IL-10 for intracellular IL-10. %CD14<sup>-</sup>CD3<sup>+</sup>CD4<sup>+</sup>IL-10<sup>+</sup> cells was determined by flow cytometry. Mean values +/- SD are shown; \*p<0.05, \*\*p<0.005

## Supplemental Table SI

| S No | CD4 <sup>+</sup> T cell count (mm <sup>3</sup> ) | Viral Load |
|------|--------------------------------------------------|------------|
| P01  | 192                                              | 348        |
| P02  | 383                                              | 52623      |
| P03  | 10                                               | 15353      |
| P04  | 524                                              | 5953       |
| P05  | 16                                               | 45066      |
| P06  | 703                                              | 20         |
| P07  | 465                                              | 115        |
| P10  | 349                                              | 21         |
| P11  | 617                                              | 9863       |
| P12  | 832                                              | 33         |
| P13  | 571                                              | 12468      |
| P14  | 739                                              | 20         |
| P15  | 628                                              | 41063      |
| P17  | 727                                              | 20         |
| P18  | 511                                              | 20         |
| P20  | 413                                              | 54392      |

### CD4<sup>+</sup> T cell count and Viral Load of the HIV(+) donors.

CD4 T cell count and viral load of HIV (+) individuals was determined; IL-27 quantity in the plasma was calculated and correlated with CD4 T cell count and viral load (Figure 6a & 6b).
